# Supplementary material for: Protective Effect of Hawthorn Fruit Extract against High Fructose-Induced Oxidative Stress and Endoplasmic Reticulum Stress in Pancreatic β-Cells
Source: MDPI journal article supplement (doi:10.3390/foods12061130), 2023-03-08
Supplement: s1 [file s1]

# Supplementary Table S1

## Protective Effect of Hawthorn Fruits Extract against High Fructose-Induced Oxidative Stress and Endoplasmic Reticulum Stress in Pancreatic $\beta$ -cells

Hsiu-Man Lien<sup>1,2,\*</sup>, Hsin-Tang Lin<sup>3</sup>, Shiau-Huei Huang<sup>1</sup>, Ying-Ru Chen<sup>1</sup>, Chao-Lu Huang<sup>2</sup>, Chia-Chang Chen<sup>2</sup> and Charng-Cherng Chyau<sup>1,\*</sup>

<sup>1</sup> Research Institute of Biotechnology, Hungkuang University, Shalu District, Taichung 43302, Taiwan; ccchyau@hk.edu.tw (C.-C.C.); a7651618@yahoo.com.tw (S.-H.H.); wk00552@gmail.com (Y.-R.C.)

<sup>2</sup> SYi Biotek, 2F, No. 26, Keyuan Rd., Xitun District, Taichung 40763, Taiwan; lien736@gamil.com (H.-M.L.); chaoluhng@gmail.com (C.-L.H.); casey5115@gmail.com (C.-C.C.)

<sup>3</sup> Graduate Institute of Food Safety, National Chung Hsing University, 145, Xingda Road, Taichung City 40227, Taiwan; linhs@nchu.edu.tw (H.-T.L.)

\*Correspondence: lien736@gamil.com (H.-M.L.); ccchyau@hk.edu.tw (C.-C.C.)

**Table S1.** Primers for real-time PCR analyses.

| Name (Accession No.)                               | Sequence (5' to 3')                                     | Product Length (bp) |
|----------------------------------------------------|---------------------------------------------------------|---------------------|
| <i>GRP78</i><br>(NM_013083.2)                      | F: AGAAACTCCGGCGTGAGGTAGA<br>R: TTTCTGGACAGGTTTCATGGTAG | 176                 |
| <i>ATF6</i><br>(NM_001107196.1)                    | F: GGGAGTGAGCTGCAGGTGTA<br>R: TTATGGGTGGTAGCTGGTAA      | 137                 |
| <i>PERK</i><br>(NM_019356.1)                       | F: GCTTGCTATGGTTACGAAGGC<br>R: CATCACATACCTGGGTGGAG     | 120                 |
| <i>IRE1<math>\alpha</math></i><br>(NM_001191926.1) | F: CGAGCCATGAGGAATAAGAG<br>R: GGAAACGTGATGTGAAGTAG      | 109                 |
| <i>CHOP(GADD153)</i><br>(NM_024134.2)              | F: AGCTGGAAGCCTGGTATGAGGA<br>R: AGCTAGGGATGCAGGGTCAA    | 134                 |
| <i>actin</i><br>(NM_007392)                        | F: TCTCCACCTTCCAGCAGATGT<br>R: AGCTCAGTAACAGTCCGCCTAGA  | 100                 |

F: Forward, R: Reverse

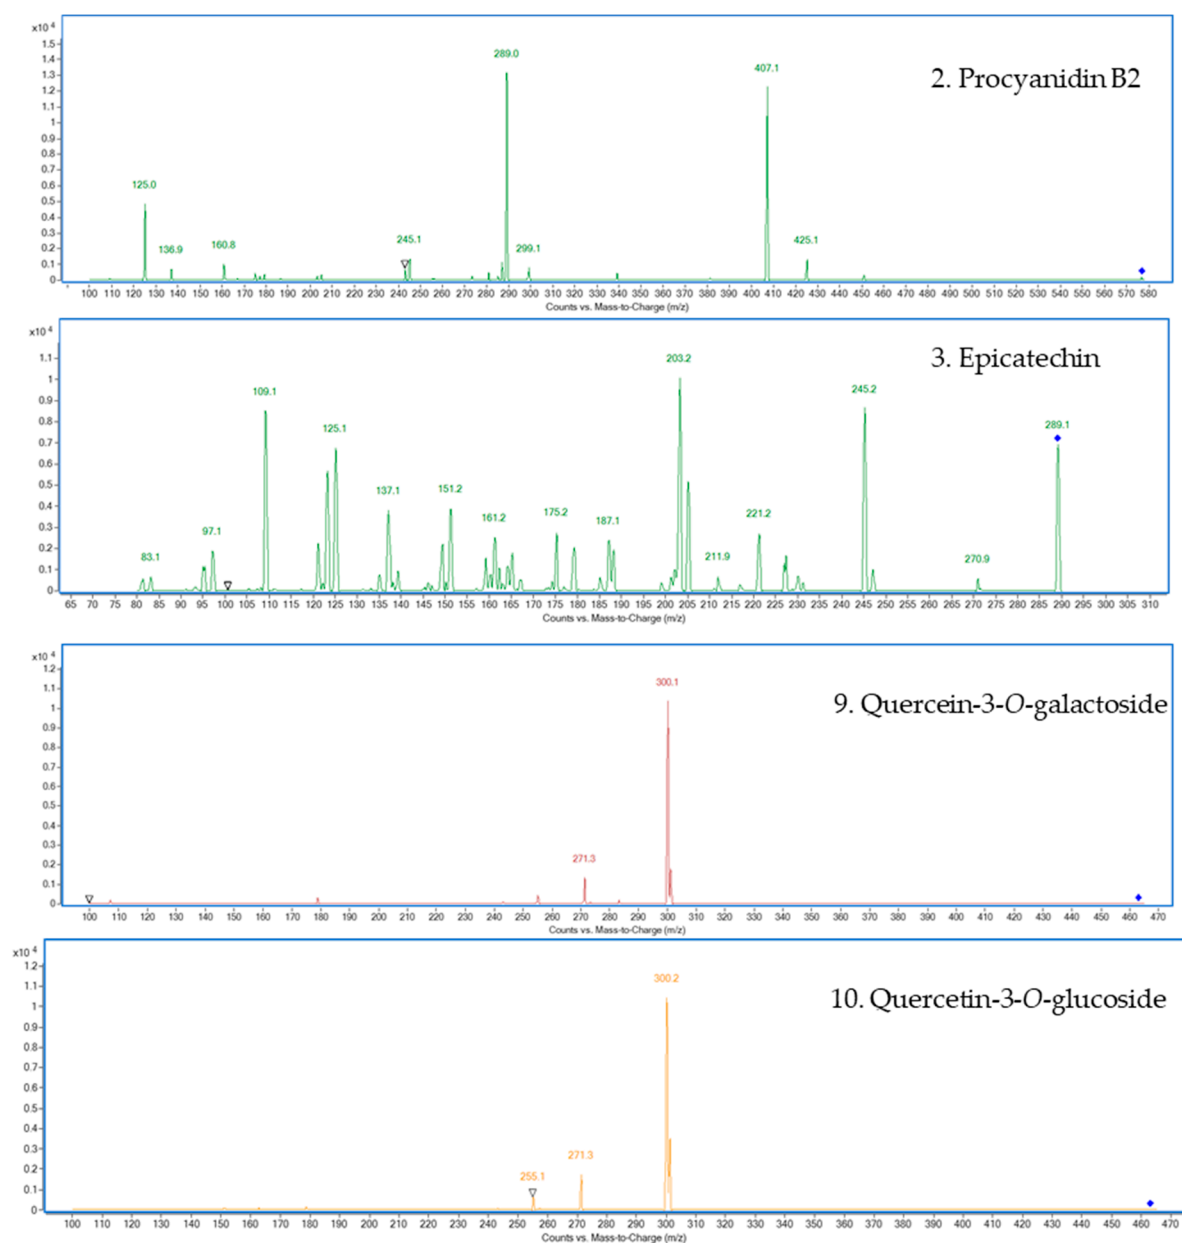

Figure S1. The ESI(-)-MS/MS spectra of the four authentic standards. Numbers are referred to Table 3.
